# Supplementary material
Source: PubMed Central journal article supplement (PMC3911578)
Supplement: JVI.01812-13_zjv999098612so1.pdf [file JVI.01812-13_zjv999098612so1.pdf]

**Supplementary Table S1.** Proteins identified by mass spectrometry in three bands in the BEFV  $\alpha$ 1-binding fraction resolved by SDS-PAGE.

*Peptide probability Thresholds: 95.0% minimum*

*Protein probability Thresholds: 99.9% minimum and 2 peptides minimum*

| BEFVa1-20120404 (~120 kDa band) |                                                                                                          |                  |            |                       |                  |
|---------------------------------|----------------------------------------------------------------------------------------------------------|------------------|------------|-----------------------|------------------|
| #                               | Identified Proteins                                                                                      | Accession Number | Mol Weight | No of Unique Peptides | Percent coverage |
| 1                               | Cationic trypsin OS=Bos taurus PE=1 SV=3                                                                 | TRY1_BOVIN       | 26 kDa     | 4                     | 26%              |
| 2                               | Importin-7 OS=Homo sapiens GN=IPO7 PE=1 SV=1                                                             | IPO7_HUMAN (+1)  | 120 kDa    | 8                     | 9.80%            |
| 3                               | Keratin, type I cytoskeletal 10 OS=Homo sapiens GN=KRT10 PE=1 SV=6                                       | K1C10_HUMAN      | 59 kDa     | 8                     | 16%              |
| 4                               | Keratin, type I cytoskeletal 9 OS=Homo sapiens GN=KRT9 PE=1 SV=3                                         | K1C9_HUMAN       | 62 kDa     | 4                     | 11%              |
| 5                               | Keratin, type II cytoskeletal 1 OS=Homo sapiens GN=KRT1 PE=1 SV=6                                        | K2C1_HUMAN       | 66 kDa     | 7                     | 12%              |
| 6                               | Heterogeneous nuclear ribonucleoprotein U OS=Homo sapiens GN=HNRNPU PE=1 SV=6                            | HNRPU_HUMAN      | 91 kDa     | 2                     | 4.00%            |
| 7                               | Myosin-Ib OS=Homo sapiens GN=MYO1B PE=2 SV=3                                                             | MYO1B_HUMAN (+1) | 132 kDa    | 6                     | 6.70%            |
| 8                               | Sodium/potassium-transporting ATPase subunit alpha-1 OS=Oryctolagus cuniculus GN=ATP1A1 PE=2 SV=2        | AT1A1_RABIT      | 113 kDa    | 4                     | 6.50%            |
| 9                               | Nucleolin OS=Homo sapiens GN=NCL PE=1 SV=3                                                               | NUCL_HUMAN (+2)  | 77 kDa     | 5                     | 8.20%            |
| 10                              | Kinesin-1 heavy chain OS=Homo sapiens GN=KIF5B PE=1 SV=1                                                 | KINH_HUMAN       | 110 kDa    | 3                     | 3.70%            |
| 11                              | Serum albumin OS=Bos taurus GN=ALB PE=1 SV=4                                                             | ALBU_BOVIN       | 69 kDa     | 2                     | 4.10%            |
| 12                              | Importin-5 OS=Homo sapiens GN=IPO5 PE=1 SV=4                                                             | IPO5_HUMAN       | 124 kDa    | 4                     | 5.00%            |
| 13                              | ATP-citrate synthase OS=Homo sapiens GN=ACLY PE=1 SV=3                                                   | ACLY_HUMAN       | 121 kDa    | 2                     | 2.70%            |
| 14                              | Keratin, type I cytoskeletal 16 OS=Homo sapiens GN=KRT16 PE=1 SV=4                                       | K1C16_HUMAN      | 51 kDa     | 2                     | 6.30%            |
| 15                              | Keratin, type II cytoskeletal 2 epidermal OS=Homo sapiens GN=KRT2 PE=1 SV=2                              | K22E_HUMAN       | 65 kDa     | 2                     | 8.80%            |
| 16                              | Bifunctional aspartokinase/homoserine dehydrogenase 2 OS=Escherichia coli (strain K12) GN=metL PE=1 SV=3 | AK2H_ECOLI       | 89 kDa     | 2                     | 3.80%            |
| 17                              | Ephrin type-B receptor 2 OS=Homo sapiens GN=EPHB2 PE=1 SV=5                                              | EPHB2_HUMAN (+1) | 117 kDa    | 2                     | 2.70%            |
| 18                              | NAD(P) transhydrogenase, mitochondrial OS=Bos taurus GN=NNTM PE=1 SV=3                                   | NNTM_BOVIN (+2)  | 114 kDa    | 2                     | 2.90%            |
| 19                              | Poly [ADP-ribose] polymerase 1 OS=Homo sapiens GN=PARP1 PE=1 SV=4                                        | PARP1_HUMAN      | 113 kDa    | 2                     | 2.60%            |
| 20                              | Nck-associated protein 1 OS=Homo sapiens GN=NCKAP1 PE=1 SV=1                                             | NCKP1_HUMAN (+1) | 129 kDa    | 2                     | 2.00%            |
| 21                              | Matrin-3 OS=Homo sapiens GN=MATR3 PE=1 SV=2                                                              | MATR3_HUMAN      | 95 kDa     | 3                     | 5.00%            |
| 22                              | Importin-8 OS=Homo sapiens GN=IPO8 PE=1 SV=2                                                             | IPO8_HUMAN       | 120 kDa    | 2                     | 3.50%            |

BEFVa1-20120404 (~97 kDa band)

| #  | Identified Proteins                                                                                   | Accession Number | Molecular Weight | No of Unique Peptides | Percent coverage |
|----|-------------------------------------------------------------------------------------------------------|------------------|------------------|-----------------------|------------------|
| 1  | Cationic trypsin OS=Bos taurus PE=1 SV=3                                                              | TRY1_BOVIN       | 26 kDa           | 5                     | 35%              |
| 2  | Importin subunit beta-1 OS=Homo sapiens GN=KPNB1 PE=1 SV=2                                            | IMB1_HUMAN       | 97 kDa           | 13                    | 18%              |
| 3  | Keratin, type II cytoskeletal 1 OS=Homo sapiens GN=KRT1 PE=1 SV=6                                     | K2C1_HUMAN       | 66 kDa           | 11                    | 30%              |
| 4  | Keratin, type I cytoskeletal 9 OS=Homo sapiens GN=KRT9 PE=1 SV=3                                      | K1C9_HUMAN       | 62 kDa           | 7                     | 18%              |
| 5  | Keratin, type I cytoskeletal 10 OS=Homo sapiens GN=KRT10 PE=1 SV=6                                    | K1C10_HUMAN      | 59 kDa           | 6                     | 15%              |
| 6  | Far upstream element-binding protein 2 OS=Homo sapiens GN=KHSRP PE=1 SV=4                             | FUBP2_HUMAN      | 73 kDa           | 7                     | 11%              |
| 7  | Large T antigen OS=Simian virus 40 PE=1 SV=2                                                          | LT_SV40          | 82 kDa           | 4                     | 6.50%            |
| 8  | Signal transducer and activator of transcription 1-alpha/beta OS=Homo sapiens GN=STAT1 PE=1 SV=2      | STAT1_HUMAN      | 87 kDa           | 2                     | 4.00%            |
| 9  | Heat shock protein HSP 90-alpha OS=Bos taurus GN=HSP90AA1 PE=2 SV=3                                   | HS90A_BOVIN (+6) | 85 kDa           | 6                     | 11%              |
| 10 | Dynamin-like 120 kDa protein, mitochondrial OS=Homo sapiens GN=OPA1 PE=1 SV=3                         | OPA1_HUMAN (+2)  | 112 kDa          | 5                     | 6.00%            |
| 11 | Keratin, type II cytoskeletal 2 epidermal OS=Homo sapiens GN=KRT2 PE=1 SV=2                           | K22E_HUMAN       | 65 kDa           | 3                     | 11%              |
| 12 | DNA replication licensing factor MCM5 OS=Homo sapiens GN=MCM5 PE=1 SV=5                               | MCM5_HUMAN       | 82 kDa           | 3                     | 5.00%            |
| 13 | Mitochondrial inner membrane protein OS=Homo sapiens GN=IMMT PE=1 SV=1                                | IMMT_HUMAN       | 84 kDa           | 3                     | 5.10%            |
| 14 | Transportin-1 OS=Bos taurus GN=TNPO1 PE=2 SV=2                                                        | TNPO1_BOVIN (+2) | 102 kDa          | 5                     | 7.20%            |
| 15 | Sodium/potassium-transporting ATPase subunit alpha-1 OS=Oryctolagus cuniculus GN=ATP1A1 PE=2 SV=2     | AT1A1_RABIT      | 113 kDa          | 4                     | 6.10%            |
| 16 | Interleukin enhancer-binding factor 3 OS=Homo sapiens GN=ILF3 PE=1 SV=3                               | ILF3_HUMAN       | 95 kDa           | 3                     | 3.90%            |
| 17 | Heat shock protein HSP 90-beta OS=Equus caballus GN=HSP90AB1 PE=2 SV=3                                | HS90B_HORSE (+5) | 83 kDa           | 4                     | 14%              |
| 18 | Serum albumin OS=Bos taurus GN=ALB PE=1 SV=4                                                          | ALBU_BOVIN       | 69 kDa           | 2                     | 3.80%            |
| 19 | Keratin, type I cytoskeletal 14 OS=Homo sapiens GN=KRT14 PE=1 SV=4                                    | K1C14_HUMAN      | 52 kDa           | 4                     | 12%              |
| 20 | Transferrin receptor protein 1 OS=Pongo abelii GN=TFRC PE=2 SV=1                                      | TFR1_PONAB       | 85 kDa           | 3                     | 5.80%            |
| 21 | Elongation factor 2 OS=Bos taurus GN=EEF2 PE=2 SV=3                                                   | EF2_BOVIN (+4)   | 95 kDa           | 2                     | 2.40%            |
| 22 | Putative pre-mRNA-splicing factor ATP-dependent RNA helicase DHX15 OS=Homo sapiens GN=DHX15 PE=1 SV=2 | DHX15_HUMAN (+2) | 91 kDa           | 2                     | 3.60%            |
| 23 | Heterogeneous nuclear ribonucleoprotein U-like protein 1 OS=Homo sapiens GN=HNRNPUL1 PE=1 SV=2        | HNRL1_HUMAN      | 96 kDa           | 2                     | 2.70%            |
| 24 | Catenin beta-1 OS=Bos taurus GN=CTNNB1 PE=2 SV=1                                                      | CTNB1_BOVIN (+3) | 86 kDa           | 3                     | 5.80%            |
| 25 | Integrin beta-1 OS=Homo sapiens GN=ITGB1 PE=1 SV=2                                                    | ITB1_HUMAN (+1)  | 88 kDa           | 3                     | 4.80%            |
| 26 | Plasminogen OS=Bos taurus GN=PLG PE=1 SV=2                                                            | PLMN_BOVIN       | 91 kDa           | 3                     | 4.70%            |

27 Bifunctional aspartokinase/homoserine dehydrogenase 2 OS=Escherichia coli (strain K12) GN=metL PE=1 SV=3 AK2H\_ECOLI 89 kDa 2 3.70%

**BEFVa1-20120404 (~60 kDa band)**

| Identified Proteins                                                                                                     | Accession Number | Molecular Weight | No of Unique Peptides | Percent coverage |
|-------------------------------------------------------------------------------------------------------------------------|------------------|------------------|-----------------------|------------------|
| 1 Cationic trypsin OS=Bos taurus PE=1 SV=3                                                                              | TRY1_BOVIN       | 26 kDa           | 6                     | 39%              |
| 2 60 kDa heat shock protein, mitochondrial OS=Homo sapiens GN=HSPD1 PE=1 SV=2                                           | CH60_HUMAN       | 61 kDa           | 11                    | 25%              |
| 3 Nucleosome assembly protein 1-like 4 OS=Homo sapiens GN=NAP1L4 PE=1 SV=1                                              | NP1L4_HUMAN      | 43 kDa           | 8                     | 17%              |
| 4 Cytoskeleton-associated protein 4 OS=Homo sapiens GN=CKAP4 PE=1 SV=2                                                  | CKAP4_HUMAN      | 66 kDa           | 9                     | 19%              |
| 5 Keratin, type I cytoskeletal 9 OS=Homo sapiens GN=KRT9 PE=1 SV=3                                                      | K1C9_HUMAN       | 62 kDa           | 4                     | 12%              |
| 6 Nucleosome assembly protein 1-like 1 OS=Bos taurus GN=NAP1L1 PE=2 SV=1                                                | NP1L1_BOVIN (+2) | 45 kDa           | 4                     | 20%              |
| 7 Keratin, type II cytoskeletal 1 OS=Homo sapiens GN=KRT1 PE=1 SV=6                                                     | K2C1_HUMAN       | 66 kDa           | 7                     | 19%              |
| 8 Keratin, type I cytoskeletal 10 OS=Homo sapiens GN=KRT10 PE=1 SV=6                                                    | K1C10_HUMAN      | 59 kDa           | 7                     | 14%              |
| 9 T-complex protein 1 subunit theta OS=Macaca fascicularis GN=CCT8 PE=2 SV=1                                            | TCPQ_MACFA       | 60 kDa           | 4                     | 8.80%            |
| 10 Vimentin OS=Chlorocebus aethiops GN=VIM PE=1 SV=3                                                                    | VIME_CHLAE (+1)  | 54 kDa           | 2                     | 4.50%            |
| 11 Keratin, type II cytoskeletal 2 epidermal OS=Homo sapiens GN=KRT2 PE=1 SV=2                                          | K22E_HUMAN       | 65 kDa           | 3                     | 7.70%            |
| 12 Beta-lactoglobulin OS=Ovis orientalis musimon GN=LGB PE=1 SV=1                                                       | LACB_OVIMU       | 18 kDa           | 2                     | 14%              |
| 13 Alpha-S1-casein OS=Bos taurus GN=CSN1S1 PE=1 SV=2                                                                    | CASA1_BOVIN      | 25 kDa           | 2                     | 13%              |
| 14 Translation initiation factor eIF-2B subunit delta OS=Homo sapiens GN=EIF2B4 PE=1 SV=2                               | EI2BD_HUMAN      | 58 kDa           | 3                     | 7.10%            |
| 15 Pyruvate kinase isozymes M1/M2 OS=Homo sapiens GN=PKM2 PE=1 SV=4                                                     | KPYM_HUMAN       | 58 kDa           | 4                     | 11%              |
| 16 Serum albumin OS=Bos taurus GN=ALB PE=1 SV=4                                                                         | ALBU_BOVIN       | 69 kDa           | 3                     | 6.30%            |
| 17 Importin subunit alpha-2 OS=Homo sapiens GN=KPNA2 PE=1 SV=1                                                          | IMA2_HUMAN       | 58 kDa           | 2                     | 4.90%            |
| 18 Far upstream element-binding protein 3 OS=Homo sapiens GN=FUBP3 PE=1 SV=2                                            | FUBP3_HUMAN      | 62 kDa           | 2                     | 3.80%            |
| 19 Prelamin-A/C OS=Homo sapiens GN=LMNA PE=1 SV=1                                                                       | LMNA_HUMAN (+1)  | 74 kDa           | 2                     | 3.80%            |
| 20 T-complex protein 1 subunit delta OS=Homo sapiens GN=CCT4 PE=1 SV=4                                                  | TCPD_HUMAN (+2)  | 58 kDa           | 2                     | 6.50%            |
| 21 Phenylalanine--tRNA ligase alpha chain OS=Pongo abelii GN=FARSA PE=2 SV=1                                            | SYFA_PONAB       | 58 kDa           | 2                     | 4.50%            |
| 22 Serine/threonine-protein phosphatase 2A 65 kDa regulatory subunit A alpha isoform OS=Bos taurus GN=PPP2R1A PE=1 SV=1 | 2AAA_BOVIN (+3)  | 65 kDa           | 3                     | 7.00%            |
| 23 Nicalin OS=Homo sapiens GN=NCLN PE=1 SV=2                                                                            | NCLN_HUMAN       | 63 kDa           | 3                     | 7.60%            |
| 24 60 kDa chaperonin OS=Ralstonia metallidurans (strain CH34 / ATCC 43123 / DSM 2839) GN=groL PE=3 SV=1                 | CH60_RALME       | 57 kDa           | 3                     | 9.70%            |
| 25 T-complex protein 1 subunit gamma OS=Bos taurus GN=CCT3 PE=1 SV=1                                                    | TCPG_BOVIN (+5)  | 61 kDa           | 2                     | 4.00%            |

|    |                                                                                               |                   |        |   |       |
|----|-----------------------------------------------------------------------------------------------|-------------------|--------|---|-------|
| 26 | Alpha-1-antitrypsin OS=Bos taurus GN=SERPINA1 PE=1 SV=1                                       | A1AT_BOVIN        | 46 kDa | 2 | 6.00% |
| 27 | Nucleolar protein 58 OS=Homo sapiens GN=NOP58 PE=1 SV=1                                       | NOP58_HUMAN (+1)  | 60 kDa | 2 | 5.10% |
| 28 | 5'-AMP-activated protein kinase catalytic subunit alpha-1 OS=Homo sapiens GN=PRKAA1 PE=1 SV=4 | AAPK1_HUMAN (+4)  | 64 kDa | 2 | 3.80% |
| 29 | T-complex protein 1 subunit alpha OS=Homo sapiens GN=TCP1 PE=1 SV=1                           | TCPA_HUMAN (+1)   | 60 kDa | 2 | 5.40% |
| 30 | Rubber elongation factor protein OS=Hevea brasiliensis PE=1 SV=2                              | REF_HEVBR         | 15 kDa | 2 | 21%   |
| 31 | Tubulin alpha-1A chain OS=Cricetulus griseus GN=TUBA1A PE=2 SV=1                              | TBA1A_CRIGR (+22) | 50 kDa | 2 | 7.80% |

---
